# Supplementary material for: Vaccine Hesitancy among Parents and Its Association with the Uptake of Measles Vaccine in Urban Settings in Khartoum State, Sudan
Source: MDPI journal article supplement (doi:10.3390/vaccines10020205), 2022-01-28
Supplement: s1 [file s1]

# Supplementary Materials

**Table S1.** Frequency distribution of the 15 PACV items ( $n = 495$ ).

| No. PACV's items |                                                                                                             |                   | N (%)      |
|------------------|-------------------------------------------------------------------------------------------------------------|-------------------|------------|
| 1                | Have you ever delayed having your child get measles vaccine for reasons other than illness or allergy?      | Yes               | 89 (18.0)  |
|                  |                                                                                                             | No                | 403 (81.4) |
|                  |                                                                                                             | I don't know      | 3 (0.6)    |
| 2                | Have you ever decided not to have your child get measles vaccine for reasons other than illness or allergy? | Yes               | 11 (2.2)   |
|                  |                                                                                                             | No                | 481 (97.2) |
|                  |                                                                                                             | I don't know      | 3 (0.6)    |
| 3                | How sure are you that following the recommended measles vaccine schedule is a good idea for your child?     | 0-5               | 15 (3.0)   |
|                  |                                                                                                             | 6-7               | 42 (8.5)   |
|                  |                                                                                                             | 8-10              | 438 (88.4) |
| 4                | Children get more shots of measles vaccine than are good for them.                                          | Strongly agree    | 16 (3.2)   |
|                  |                                                                                                             | Agree             | 20 (4.0)   |
|                  |                                                                                                             | Not sure          | 16 (3.2)   |
|                  |                                                                                                             | Disagree          | 293 (59.2) |
|                  |                                                                                                             | Strongly disagree | 149 (30.1) |
|                  |                                                                                                             | Missing           | 1 (0.2)    |
| 5                | I believe that measles is a severe disease.                                                                 | Strongly agree    | 306 (61.8) |
|                  |                                                                                                             | Agree             | 171 (34.5) |
|                  |                                                                                                             | Not sure          | 5 (1.0)    |
|                  |                                                                                                             | Disagree          | 13 (2.6)   |
| 6                | It is better for my child to develop immunity by getting sick than to get a shot.                           | Strongly agree    | 25 (5.1)   |
|                  |                                                                                                             | Agree             | 12 (2.4)   |
|                  |                                                                                                             | Not sure          | 2 (0.4)    |
|                  |                                                                                                             | Disagree          | 222 (44.8) |
|                  |                                                                                                             | Strongly disagree | 234 (47.3) |

|    |                                                                                                        |                      |            |
|----|--------------------------------------------------------------------------------------------------------|----------------------|------------|
| 7  | It is better for children to get fewer vaccines at the same time.                                      | Strongly agree       | 56 (11.3)  |
|    |                                                                                                        | Agree                | 58 (11.7)  |
|    |                                                                                                        | Not sure             | 13 (2.6)   |
|    |                                                                                                        | Disagree             | 251 (50.7) |
|    |                                                                                                        | Strongly disagree    | 117 (23.6) |
| 8  | How concerned are you that your child might have a serious side effect from a shot of measles vaccine? | Not at all concerned | 206 (41.6) |
|    |                                                                                                        | Not concerned        | 190 (38.4) |
|    |                                                                                                        | Not sure             | 5 (1.0)    |
|    |                                                                                                        | Concerned            | 60 (12.1)  |
|    |                                                                                                        | Very concerned       | 34 (6.9)   |
| 9  | How concerned are you that any one of the measles vaccine shots might not be safe?                     | Not at all concerned | 251 (50.7) |
|    |                                                                                                        | Not concerned        | 162 (32.7) |
|    |                                                                                                        | Not sure             | 18 (3.6)   |
|    |                                                                                                        | Concerned            | 48 (9.7)   |
|    |                                                                                                        | Very concerned       | 16 (3.2)   |
| 10 | How concerned are you that a shot of measles vaccine might not prevent measles?                        | Not at all concerned | 209 (42.2) |
|    |                                                                                                        | Not concerned        | 187 (37.8) |
|    |                                                                                                        | Not sure             | 17 (3.4)   |
|    |                                                                                                        | Concerned            | 61 (12.3)  |
|    |                                                                                                        | Very concerned       | 20 (4.0)   |
|    |                                                                                                        | Missing              | 1 (0.2)    |
| 11 | If you had another infant today, would you want him/her to get all the recommended (measles) shots?    | Yes                  | 483 (97.6) |
|    |                                                                                                        | No                   | 8 (1.6)    |
|    |                                                                                                        | I don't know         | 4 (0.8)    |
| 12 | Overall, how hesitant about measles vaccine shots would you consider yourself to be?                   | Not at all hesitant  | 283 (57.2) |
|    |                                                                                                        | Not hesitant         | 192 (38.8) |
|    |                                                                                                        | Not sure             | 3 (0.6)    |
|    |                                                                                                        | Hesitant             | 12 (2.4)   |
|    |                                                                                                        | Very hesitant        | 5 (1.0)    |

|    |                                                                             |                   |            |
|----|-----------------------------------------------------------------------------|-------------------|------------|
| 13 | I trust the information I receive about measles vaccine shots.              | Strongly agree    | 241 (48.7) |
|    |                                                                             | Agree             | 237 (47.9) |
|    |                                                                             | Not sure          | 7 (1.4)    |
|    |                                                                             | Disagree          | 8 (1.6)    |
|    |                                                                             | Strongly disagree | 1 (0.2)    |
|    |                                                                             | Missing           | 1 (0.2)    |
| 14 | I am able to openly discuss my concerns about shots with my child's doctor. | Strongly agree    | 269 (54.3) |
|    |                                                                             | Agree             | 202 (40.8) |
|    |                                                                             | Not sure          | 11 (2.2)   |
|    |                                                                             | Disagree          | 11 (2.2)   |
|    |                                                                             | Strongly disagree | 2 (0.4)    |
| 15 | All things considered, how much do you trust your child's doctor?           | 0-5               | 25 (5.0)   |
|    |                                                                             | 6-7               | 34 (6.9)   |
|    |                                                                             | 8-10              | 436 (88.0) |
